# Supplementary material for: SPP1 Derived from Macrophages Is Associated with a Worse Clinical Course and Chemo-Resistance in Lung Adenocarcinoma
Source: MDPI journal article supplement (doi:10.3390/cancers14184374), 2022-09-08
Supplement: s1 [file s1]

Supplementary Figure S1

Score 0 vs Score 1 vs Score 2

Cancer cell  
(SCC)

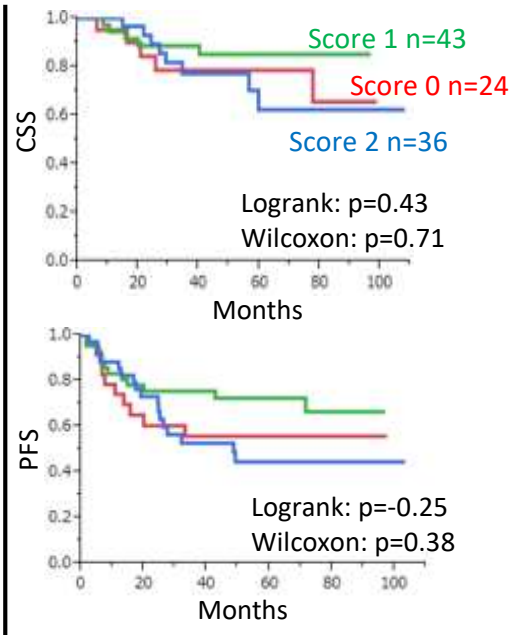

TAM

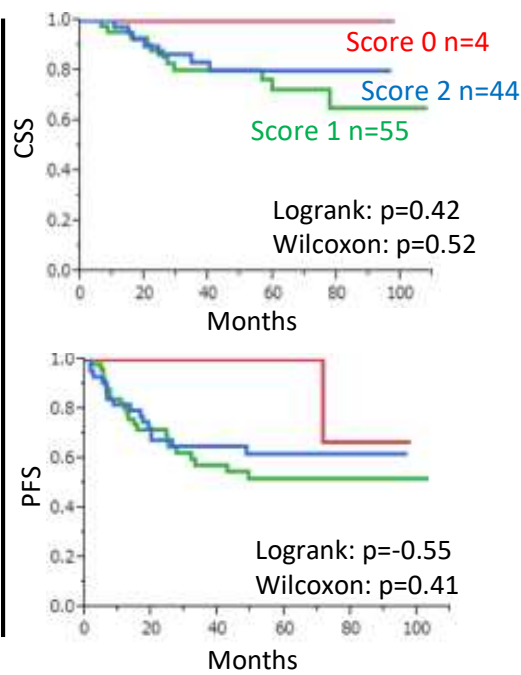

Supplementary Figure S2

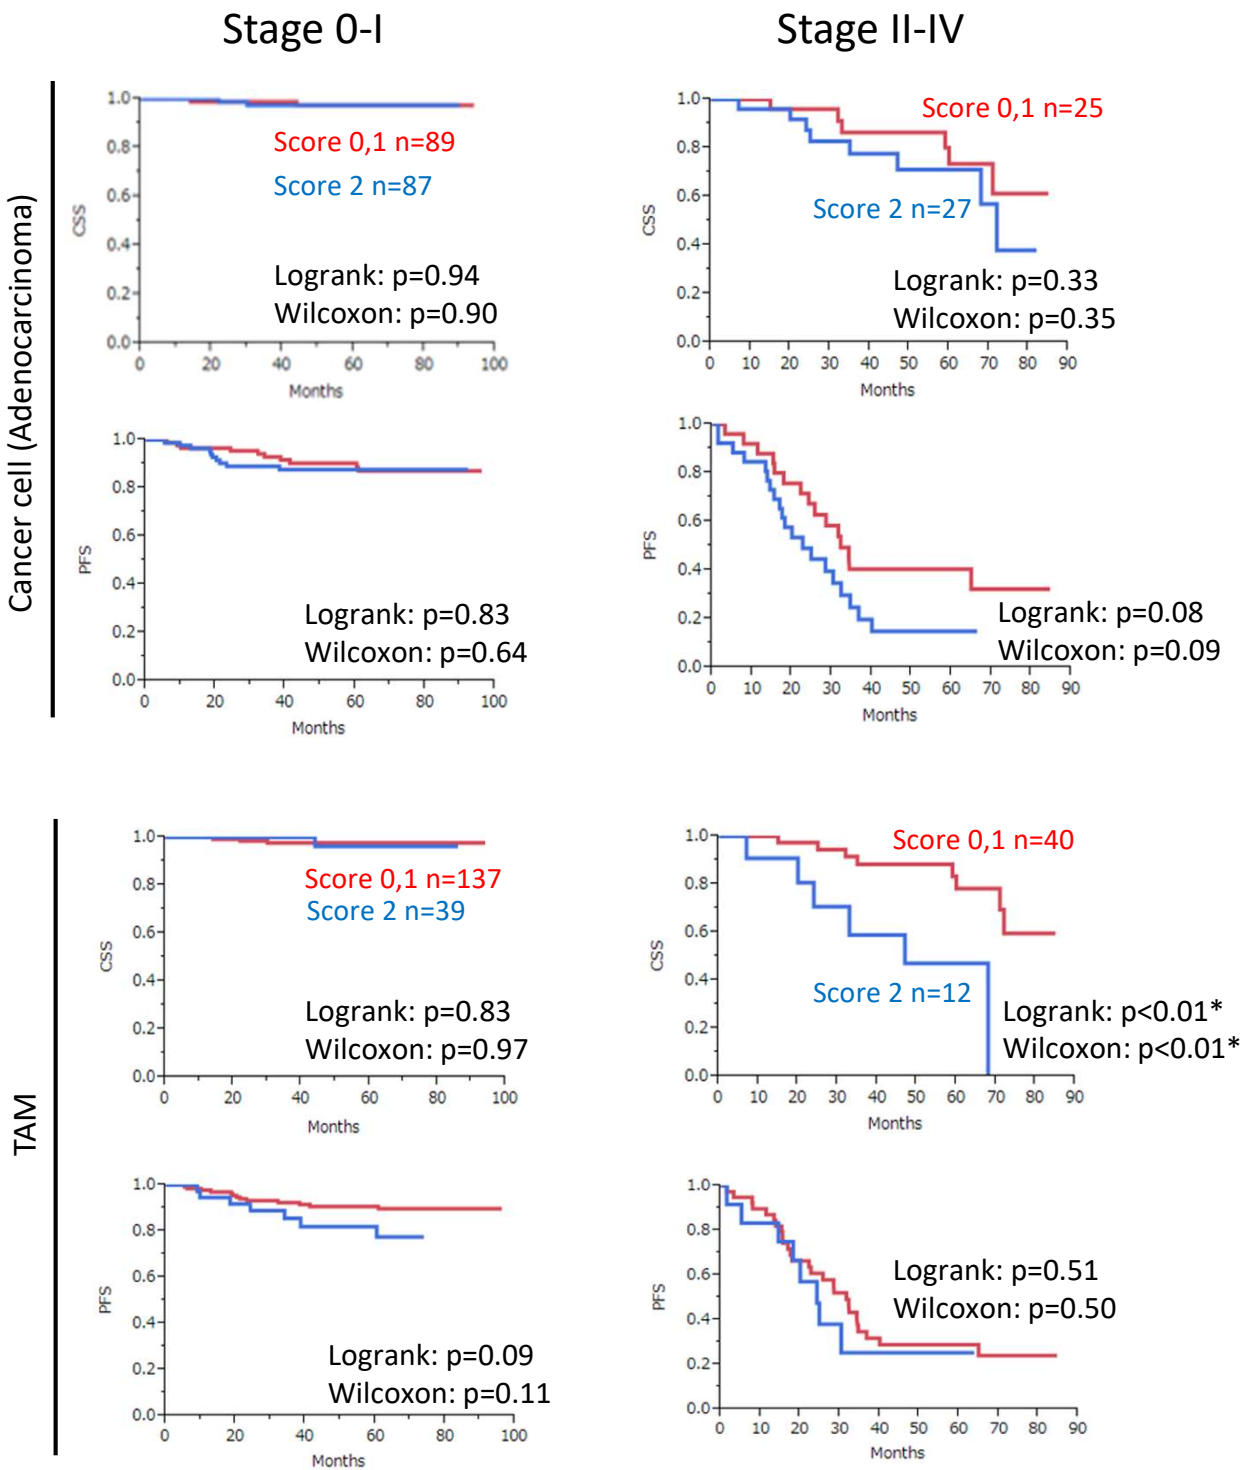

Supplementary Figure S3

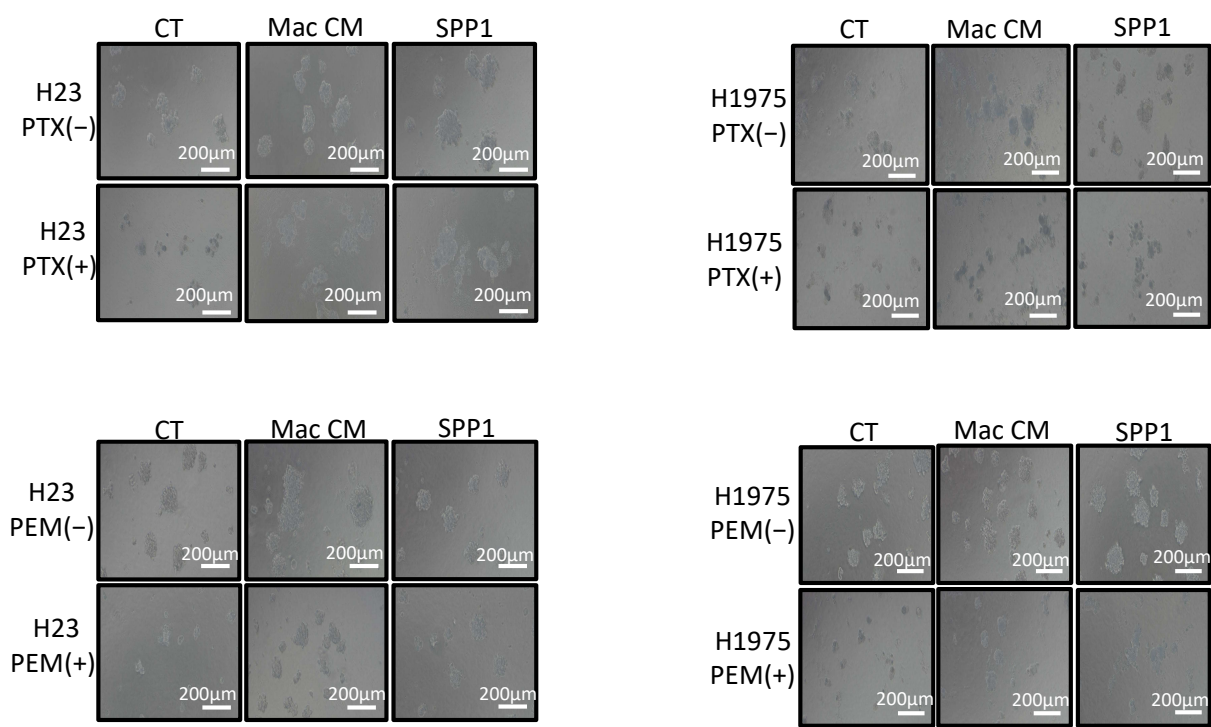

## Supplementary Table S1

| Target mRNA    |         | Sequence (5' to 3')               |
|----------------|---------|-----------------------------------|
| SPP1           | Forward | AGG.AGG.AGG.CAG.AGC.ACA           |
|                | Reverse | CTG.GTA.TGG.CAC.AGG.TGA.TG        |
| CD204          | Forward | TGG.GAA.CAT.TCT.CAG.ACC.TTG       |
|                | Reverse | AAT.CCT.CGT.GGA.CCA.CTT.TC        |
| BMI1           | Forward | CTG.CAG.CTC.GCT.TCA.AGA.TG        |
|                | Reverse | TTA.GCT.CAG.TGA.TCT.TGA.TTC.TCG.T |
| $\beta$ -actin | Forward | ATT.CCT.ATG.TGG.GCG.ACG.AG        |
|                | Reverse | AAG.GTG.TGG.TGC.CAG.ATT.TTC       |

## Supplementary Table S2

Cancer-SPP1 expression and clinicopathological factors; adenocarcinoma

|               |          | Cancer-SPP1 expression<br>(Low: Score 0,1, High: Score 2) |      |      |
|---------------|----------|-----------------------------------------------------------|------|------|
|               |          | Low                                                       | High | p    |
| Age           | <65      | 33                                                        | 34   | 1.00 |
|               | ≥65      | 81                                                        | 80   |      |
| Gender        | Male     | 55                                                        | 59   | 0.69 |
|               | Female   | 59                                                        | 55   |      |
| Smoking       | B.I.<600 | 69                                                        | 73   | 0.68 |
|               | B.I.≥600 | 45                                                        | 41   |      |
| pStage        | 0-I      | 89                                                        | 87   | 0.87 |
|               | II-VI    | 25                                                        | 27   |      |
| EGFR mutation | negative | 60                                                        | 49   | 0.20 |
|               | positive | 49                                                        | 59   |      |

Chi-square test was performed.

Cancer-SPP1 expression and clinicopathological factors; SCC

|         |          | Cancer-SPP1 expression<br>(Low: Score 0,1, High: Score 2) |      |      |
|---------|----------|-----------------------------------------------------------|------|------|
|         |          | Low                                                       | High | p    |
| Age     | <65      | 9                                                         | 11   | 0.06 |
|         | ≥65      | 58                                                        | 25   |      |
| Gender  | Male     | 60                                                        | 33   | 1.00 |
|         | Female   | 7                                                         | 3    |      |
| Smoking | B.I.<600 | 7                                                         | 7    | 0.23 |
|         | B.I.≥600 | 60                                                        | 29   |      |
| pStage  | 0-I      | 36                                                        | 16   | 0.48 |
|         | II-VI    | 31                                                        | 20   |      |

Chi-square test (Age, pStage) and Fisher's exact test (Gender, Smoking) was performed.

## Supplementary Table S3

|          | CT     | CM     | SPP1   |
|----------|--------|--------|--------|
| BMI1     | 11.61  | 14.19  | 14.6   |
| C18orf32 | 5.41   | 10.12  | 7.57   |
| C19orf71 | 5.91   | 6.4    | 8.23   |
| C1QL4    | 10.82  | 17.25  | 11.65  |
| C4orf48  | 18.76  | 27.72  | 31.83  |
| CDX2     | 6.59   | 7.63   | 8.07   |
| CEBPB    | 150.27 | 167.54 | 184.04 |
| COL1A1   | 5.92   | 9.44   | 7.43   |
| CXCL2    | 6.92   | 5.74   | 8.78   |
| GLIDR    | 5.38   | 5.98   | 7.29   |
| GTF2IP1  | 13.71  | 14.32  | 18.57  |
| HGF      | 11.59  | 17.16  | 10.52  |
| HOXC12   | 7.48   | 11.55  | 9.94   |
| MDP1     | 13.94  | 23.92  | 21.58  |
| MIB2     | 12.97  | 16.83  | 17.54  |
| MRM1     | 7.74   | 11.3   | 10.18  |
| MT1F     | 7.91   | 9.33   | 11.7   |
| NME3     | 16.76  | 28.29  | 22.74  |
| NUDT3    | 21.19  | 34.35  | 28.73  |
| PMS2P2   | 7.57   | 9.55   | 10.08  |
| S100A13  | 16.27  | 20.74  | 20.46  |
| S100A4   | 9.5    | 15.34  | 10.6   |
| SALL2    | 5.36   | 7.57   | 7.12   |
| SNORA4   | 8.06   | 31.57  | 27.71  |
| SNORD35B | 10.07  | 42.06  | 7.69   |
| SNORD58C | 8.12   | 25.44  | 31.02  |
| SNORD79  | 19.34  | 40.39  | 44.34  |
| SPIN2B   | 9.53   | 12.66  | 13.33  |
| TNFSF12  | 6.26   | 9.07   | 6.57   |

## Supplementary Table S4

TAM-SPP1 expression and PD-L1 expression of cancer cells in lung adenocarcinoma

|                           | Cancer cells     |                   |
|---------------------------|------------------|-------------------|
|                           | PD-L1 low (<50%) | PD-L1 high (≥50%) |
| TAM-SPP1 low (Score 0, 1) | 167              | 10                |
| TAM-SPP1 high (Score 2)   | 47               | 4                 |

Fisher's exact test was performed (p=0.52).

PD-L1 expression of cancer cells was evaluated based on the percentage of positive staining.

As follows: <low, 50% positive cells; high, ≥50% positive cells.

TAM-SPP1 expression and PD-L1 expression of TAM in lung adenocarcinoma

|                           | TAM              |                   |
|---------------------------|------------------|-------------------|
|                           | PD-L1 low (<50%) | PD-L1 high (≥50%) |
| TAM-SPP1 low (Score 0, 1) | 89               | 88                |
| TAM-SPP1 high (Score 2)   | 23               | 28                |

Chi-square test was performed (p=0.62).

PD-L1 expression of TAM was evaluated based on the percentage of positive staining.

As follows: <low, 50% positive cells; high, ≥50% positive cells.
