# Supplementary material for: SPP1 Derived from Macrophages Is Associated with a Worse Clinical Course and Chemo-Resistance in Lung Adenocarcinoma
Source: MDPI journal article supplement (doi:10.3390/cancers14184374), 2022-09-08

Original Western Blot Picture for Figure 4H

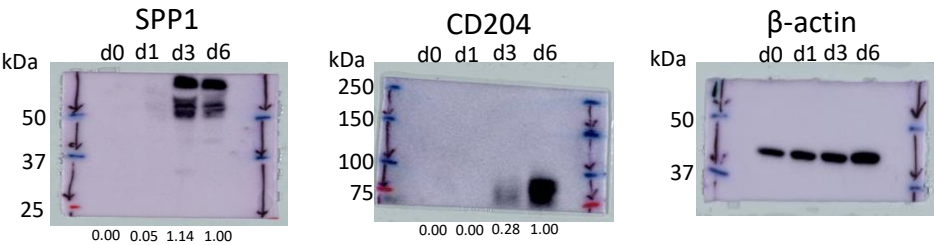

Original Western Blot Picture for Figure 6G

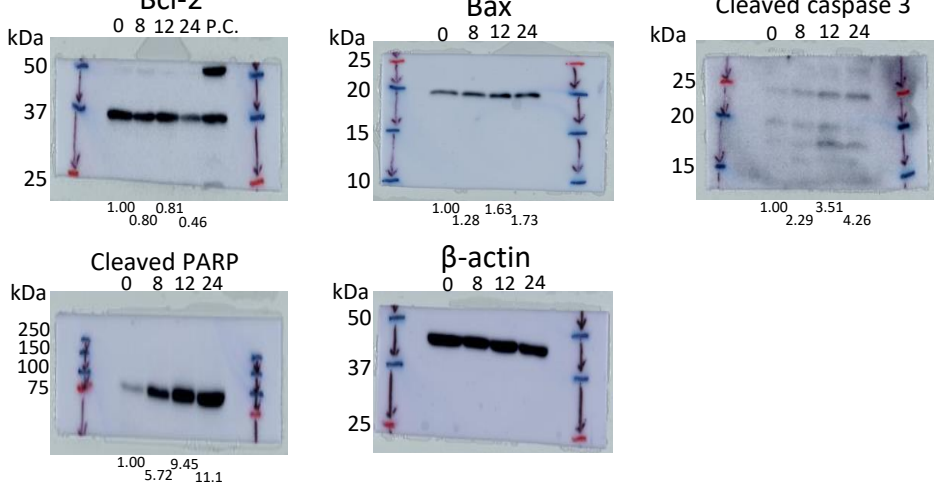

Original Western Blot Picture for Figure 6H

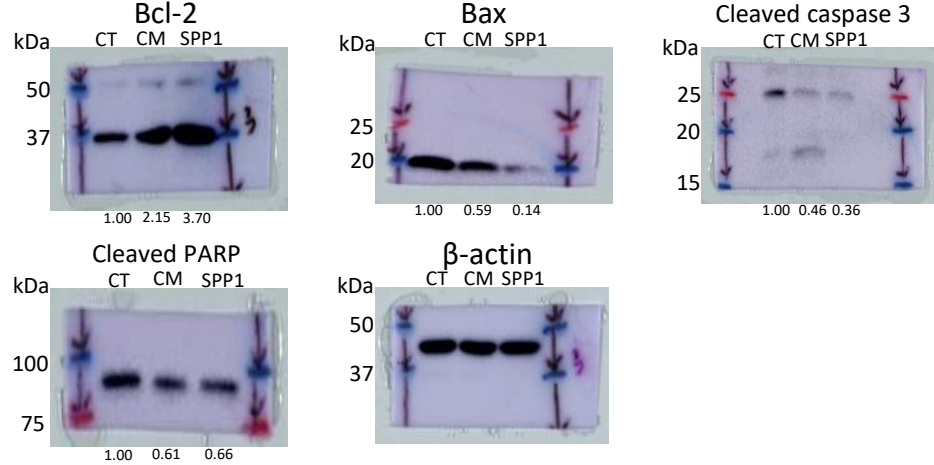

Original Western Blot Picture for Figure 7C

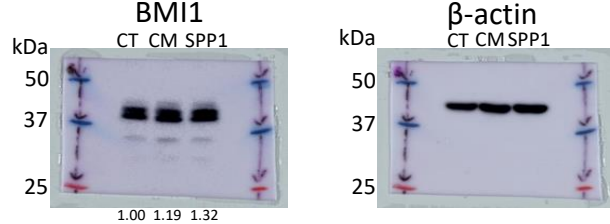

Original Western Blot Picture for Figure 7D

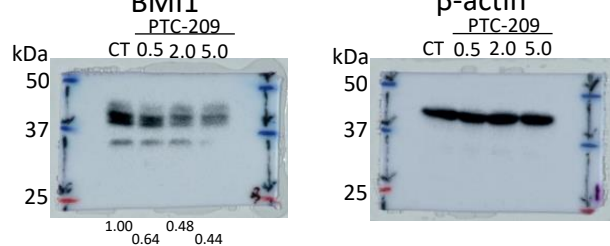

Supplement: s1 [file s1]
